# Supplementary material for: Entamoeba and Giardia parasites implicated as hosts of CRESS viruses
Source: PubMed Central journal article supplement (PMC7493932; doi:10.1038/s41467-020-18474-w), 2020-09-15
Supplement: 41467_2020_18474_MOESM1_ESM.pdf [file 41467_2020_18474_MOESM1_ESM.pdf]

**Supplementary Information for manuscript:**

***Entamoeba* and *Giardia* parasites implicated as hosts of CRESS viruses**

**Kinsella *et al.***

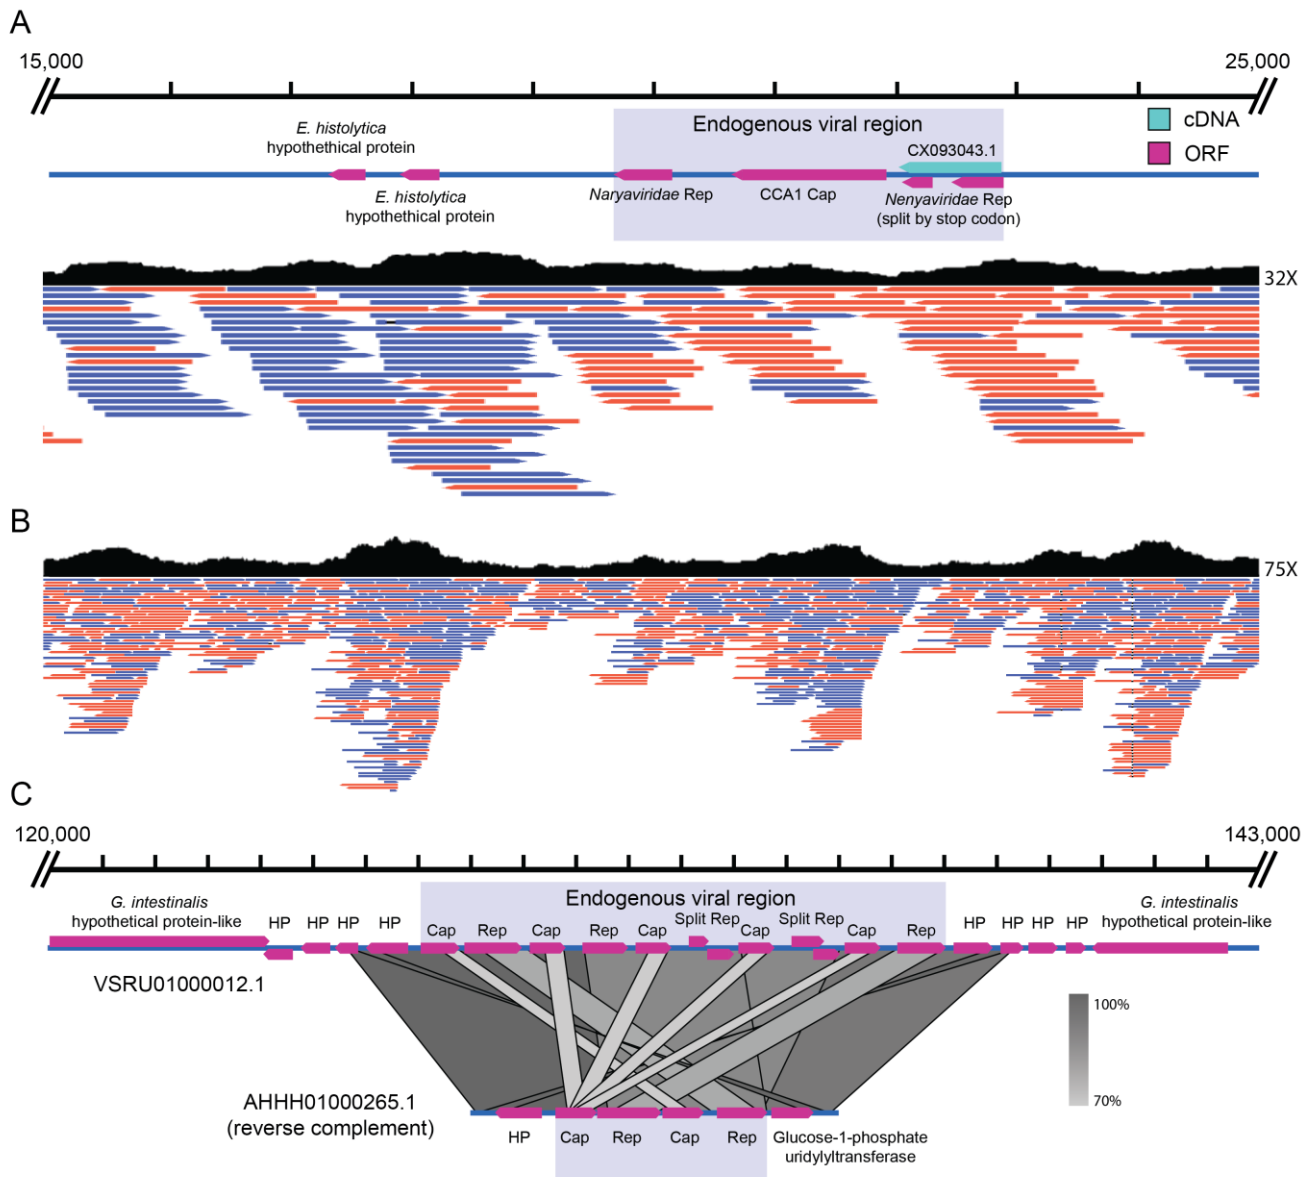

**Supplementary Figure 1. The presence of endogenous viral elements is supported by raw-read coverage or long-reads.** (A) Sanger sequencing reads from *Entamoeba histolytica* isolate HM1:IMSS (isolated in Mexico, 1967) aligned to genomic contig NW\_001915013.1, revealing coverage spanning both the endogenous virus element junctions and flanking host sequence. Maximum coverage depth is shown to the right of the coverage plot. (B) Combined 454 and Illumina sequencing reads from *E. histolytica* isolate KU27 (isolated in Japan, 2001) aligned to contig NW\_001915013.1, confirming the element is shared among independent isolates. (C) Long-read technology assists in resolution of repetitive genomic features, as shown by *Giardia duodenalis* genomic contig VSRU01000012.1, which contains a 10 kb region of tandemly repeated integrated viral genomes belonging to the *Vilyaviridae*. This contig belongs to a hybrid assembly built from nanopore long-reads and conventional short-reads<sup>1</sup> (GCA\_011634595.1). Host hypothetical proteins are annotated as 'HP'. BLASTn alignment with the short-read based contig AHHH01000265.1 reveals that the two share both the viral integration and neighbouring host sequences; however the latter contig has a shorter endogenous viral region. This is likely a result of assembly software being unable to distinguish between tandem repeat units, leading to assembly collapse. Regions of BLASTn alignment are shown by the grey blocks, with shade corresponding to % identity.

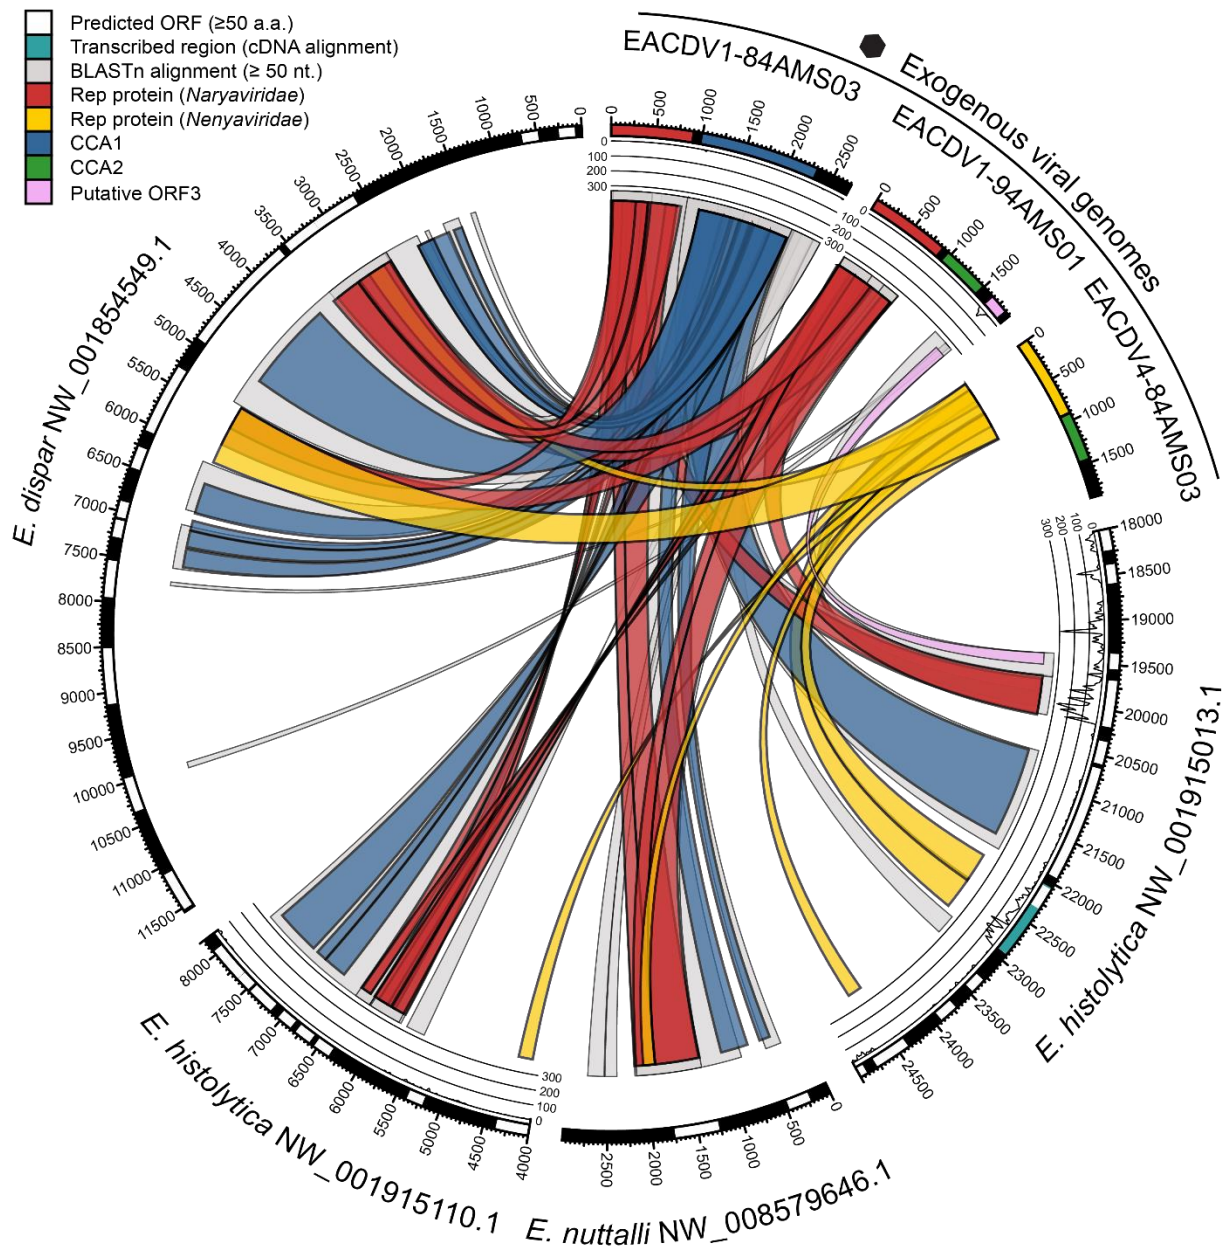

**Supplementary Figure 2. Virus genome integrations within *Entamoeba* genomes, and subsequent small RNA control.** Alignments were generated using BLASTn (grey bands) and tBLASTn (coloured bands) between three viral genomes (top right, EACDV1-84AMS03 = MT293413, EACDV1-94AMS01 = MT293412, and EACDV4-84AMS03 = MT293420) and contigs from three species of *Entamoeba*. Regions of alignment were visualised with Circos<sup>2</sup>. Open reading frames on parasite contigs were coloured white, while those of exogenous viruses were coloured according to the legend. Alignments reveal a whole viral genome integration (between nucleotides 2,600 and 5,300 of *E. dispar* contig NW\_001854549.1), and also multiple unrelated integrations by *Naryaviridae* and *Nenyaviridae* in close physical proximity to each other. Notably, this latter observation suggests CRESS integration is sometimes site-specific, and this is most likely mediated by Rep recognition of previously integrated nonanucleotide origin motifs within the host genome, a model discussed elsewhere<sup>3</sup>. To add support that endogenous viral elements are real features of parasite genomes, rather than artefacts in genome assemblies, *E. histolytica* contigs are annotated with AGO2-2 associated small RNA coverage<sup>4</sup>. Data from other *Entamoeba* species was not available. Coverage peaks (inner ring) often occur across open reading frames derived from virus integrations, suggesting these are real genomic features. Some small RNAs also exactly match exogenous viral genomes, implying a possible indirect role in antiviral defence. CCA = CRESS virus *Cap* assemblage.

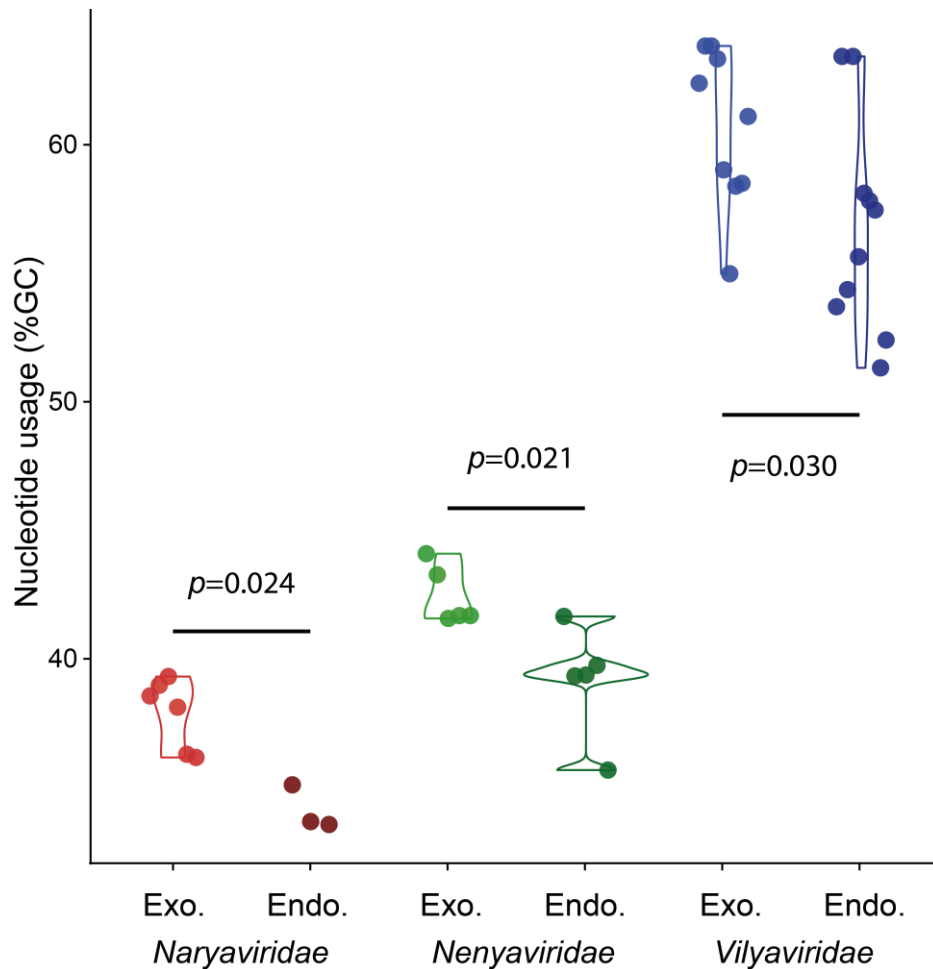

**Supplementary Figure 3. GC-content of exogenous and endogenous viruses.** Points denote GC-content of a viral *Rep* gene sequence, either from the genome of an exogenous virus (Exo.) or extracted from an endogenous viral element within a host genome (Endo.). For each viral family, Mann-Whitney U tests were performed to evaluate whether exogenous and endogenous sequences had significantly different GC-content than expected by chance (*Naryaviridae* n=9, *Nenyaviridae* n=10, *Vilyaviridae* n=19). In each case GC-content was found to be different; exogenous virus genomes have a significantly higher GC-content than related endogenous viral elements.

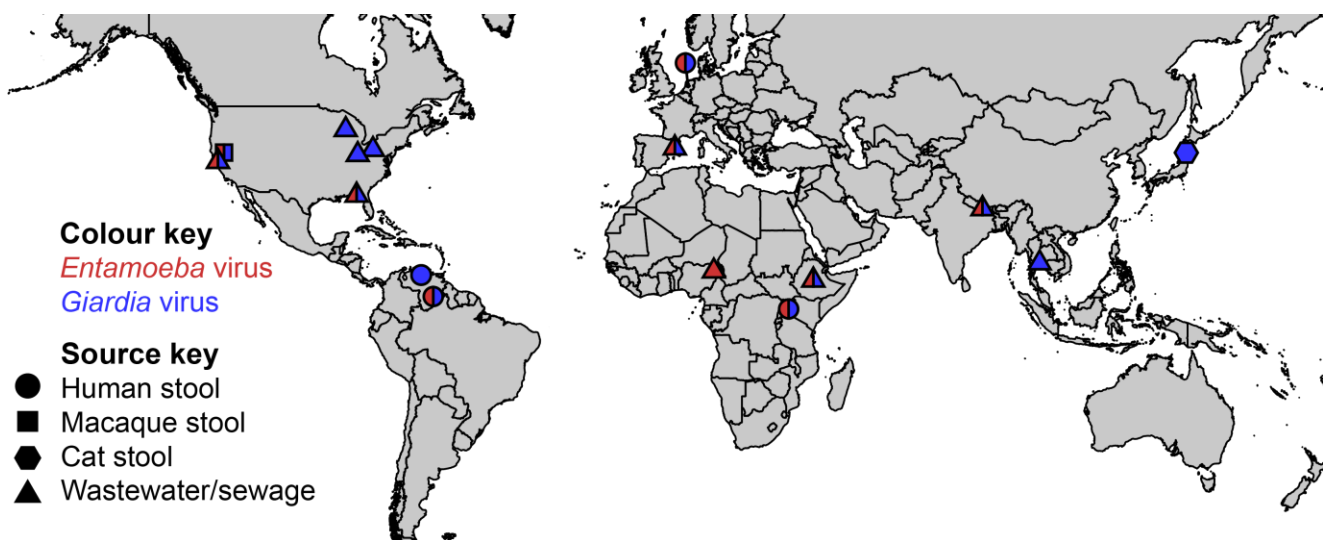

**Supplementary Figure 4. Geographical origin of public viral genomes or metagenome samples containing parasite-infecting CRESS viruses.** Shape of symbols denotes the sample source type, while colour denotes whether the identified viruses were *Entamoeba*-infecting (*Naryaviridae* and *Nenyaviridae*), *Giardia*-infecting (*Vilyaviridae*), or both (bicolour symbols). The map was adapted from world border templates available from [http://thematicmapping.org/downloads/world\\_borders.php](http://thematicmapping.org/downloads/world_borders.php), provided by Bjørn Sandvik under a Creative Commons Attribution-ShareAlike 3.0 license (<https://creativecommons.org/licenses/by-sa/3.0/legalcode>).

**Supplementary Table 1. Genomic features of parasite infecting CRESS viruses.** Origin motifs<sup>5</sup> were identified, and the conserved stem loop was confirmed using MFOLD<sup>6</sup>. Viral proteins were queried using pHMMER<sup>7</sup> against reference proteomes to find their closest relatives, with only top hits reported. All putative Rep and Cap proteins had significant similarity to representatives of these genes, however sometimes this was in a secondary hit and was therefore not reported below. E-value is the expected likelihood of the given alignment occurring by chance.

| Virus species, isolate                              | Accession | Family       | Origin motif | Replication-associated protein          |                                             |           | Capsid protein                     |                                             |           |
|-----------------------------------------------------|-----------|--------------|--------------|-----------------------------------------|---------------------------------------------|-----------|------------------------------------|---------------------------------------------|-----------|
|                                                     |           |              |              | Best hit name                           | Source species                              | E-value   | Best hit name                      | Source species                              | E-value   |
| Entamoeba-associated CRESS DNA virus 1, 84-AMS-01   | MT293410  | Naryaviridae | TAGTATTAC    | Uncharacterized protein                 | Entamoeba histolytica                       | 1.50E-78  | Uncharacterized protein (Fragment) | Punica granatum                             | 2.60E-26  |
| Entamoeba-associated CRESS DNA virus 1, 84-AMS-02   | MT293411  | Naryaviridae | TAGTATTAC    | Uncharacterized protein                 | Entamoeba histolytica                       | 7.60E-80  | Uncharacterized protein (Fragment) | Punica granatum                             | 2.60E-26  |
| Entamoeba-associated CRESS DNA virus 1, 94-AMS-01   | MT293412  | Naryaviridae | TAGTATTAC    | Uncharacterized protein                 | Entamoeba histolytica                       | 7.60E-80  | Uncharacterized protein (Fragment) | Punica granatum                             | 2.70E-29  |
| Entamoeba-associated CRESS DNA virus 1, 84-AMS-03   | MT293413  | Naryaviridae | TAGTATTAC    | Uncharacterized protein                 | Entamoeba histolytica                       | 3.40E-77  | Uncharacterized protein            | Entamoeba histolytica                       | 1.00E-147 |
| Entamoeba-associated CRESS DNA virus 2, 84-AMS-01   | MT293414  | Naryaviridae | TAGTATTAC    | Uncharacterized protein                 | Entamoeba histolytica                       | 3.10E-87  | Putative capsid protein            | Duck faeces associated circular DNA virus 3 | 6.60E-11  |
| Entamoeba-associated CRESS DNA virus 2, 94-AMS-01   | MT293415  | Naryaviridae | TAGTATTAC    | Uncharacterized protein                 | Entamoeba histolytica                       | 2.20E-87  | Putative capsid protein            | Duck faeces associated circular DNA virus 3 | 2.80E-13  |
| Entamoeba-associated CRESS DNA virus 3, 84-AMS-01   | MT293416  | Nenyaviridae | TAATATTAC    | Replication-associated protein          | Odonata-associated circular virus-14        | 1.30E-72  | Uncharacterized protein            | Entamoeba histolytica                       | 2.80E-44  |
| Entamoeba-associated CRESS DNA virus 3, 84-AMS-02   | MT293417  | Nenyaviridae | TAATATTAC    | Replication-associated protein          | Odonata-associated circular virus-14        | 4.90E-71  | Uncharacterized protein            | Entamoeba histolytica                       | 2.70E-44  |
| Entamoeba-associated CRESS DNA virus 4, 84-AMS-01   | MT293418  | Nenyaviridae | AAGTATTAC    | Replication-associated protein          | Odonata-associated circular virus-14        | 2.30E-54  | Putative capsid protein            | Duck faeces associated circular DNA virus 3 | 6.30E-12  |
| Entamoeba-associated CRESS DNA virus 4, 84-AMS-02   | MT293419  | Nenyaviridae | AAATATTAC    | Replication-associated protein          | Odonata-associated circular virus-14        | 4.60E-55  | Putative capsid protein            | Duck faeces associated circular DNA virus 3 | 2.80E-11  |
| Entamoeba-associated CRESS DNA virus 4, 84-AMS-03   | MT293420  | Nenyaviridae | AAATATTAC    | Replication-associated protein          | Odonata-associated circular virus-14        | 4.60E-55  | Putative capsid protein            | Duck faeces associated circular DNA virus 3 | 1.90E-12  |
| Giardia-associated CRESS DNA virus 1, 84-AMS-01     | MT293421  | Vilyaviridae | TAGTATTAC    | Replication-associated protein          | Fly associated circular virus 7             | 1.60E-129 | Putative capsid protein            | Feline stool-associated circular virus KU14 | 4.50E-42  |
| Giardia-associated CRESS DNA virus 1, 84-AMS-02     | MT293422  | Vilyaviridae | TAGTATTAC    | Replication-associated protein          | Fly associated circular virus 7             | 1.60E-129 | Putative capsid protein            | Feline stool-associated circular virus KU14 | 2.30E-42  |
| Giardia-associated CRESS DNA virus 1, 84-AMS-03     | MT293423  | Vilyaviridae | TAGTATTAC    | Replication-associated protein          | Fly associated circular virus 7             | 2.50E-130 | Putative capsid protein            | Feline stool-associated circular virus KU14 | 2.70E-43  |
| Giardia-associated CRESS DNA virus 1 CDS, 84-AMS-04 | MT293424  | Vilyaviridae | NA           | Replication-associated protein          | Fly associated circular virus 7             | 1.90E-131 | Putative capsid protein            | Feline stool-associated circular virus KU14 | 5.40E-45  |
| Giardia-associated CRESS DNA virus 2, 84-AMS-01     | MT293425  | Vilyaviridae | TAGTATTAC    | Replication-associated protein          | Fly associated circular virus 7             | 1.60E-90  | Putative capsid protein            | Feline stool-associated circular virus KU14 | 1.60E-75  |
| Giardia-associated CRESS DNA virus 2, 84-AMS-02     | MT293426  | Vilyaviridae | CAGTATTAC    | Replication-associated protein          | Fly associated circular virus 7             | 1.60E-87  | Putative capsid protein            | Feline stool-associated circular virus KU14 | 1.10E-71  |
| Giardia-associated CRESS DNA virus 3 CDS, 84-AMS-01 | MT293427  | Vilyaviridae | NA           | Putative replication associated protein | Feline stool-associated circular virus KU14 | 7.00E-136 | Putative capsid protein            | Feline stool-associated circular virus KU14 | 3.00E-47  |
| Giardia-associated CRESS DNA virus 3, 84-AMS-02     | MT293428  | Vilyaviridae | TAGTATTAC    | Putative replication associated protein | Feline stool-associated circular virus KU14 | 6.90E-136 | Putative capsid protein            | Feline stool-associated circular virus KU14 | 7.90E-48  |
| Giardia-associated CRESS DNA virus 4, 84-AMS-01     | MT293429  | Vilyaviridae | TAGTATTAC    | Putative replication associated protein | Feline stool-associated circular virus KU14 | 9.00E-154 | Putative capsid protein            | Feline stool-associated circular virus KU14 | 1.10E-74  |

**Supplementary Table 2. Samples positive for *Entamoeba*-infecting or *Giardia*-infecting CRESS viruses.** The cohort of each positive sample is shown, as well as the identified parasite species, or genus where species level determination was not possible.

| Number | Cohort | Sample  | Parasite                                                                         | Virus family                               | Additional detected protozoa                         |
|--------|--------|---------|----------------------------------------------------------------------------------|--------------------------------------------|------------------------------------------------------|
| 1      | 1      | 94_F005 | <i>Entamoeba coli</i>                                                            | <i>Naryaviridae</i>                        | <i>Blastocystis hominis</i><br><i>Endolimax nana</i> |
| 2      | 1      | 94_F011 | <i>Entamoeba dispar</i>                                                          | <i>Naryaviridae</i>                        |                                                      |
| 3      | 1      | 94_F038 | <i>Entamoeba dispar</i>                                                          | <i>Naryaviridae</i>                        |                                                      |
| 4      | 1      | 94_F095 | <i>Entamoeba hartmanni</i>                                                       | <i>Naryaviridae</i><br><i>Nenyaviridae</i> |                                                      |
| 5      | 1      | 94_F211 | <i>Entamoeba dispar</i>                                                          | <i>Naryaviridae</i>                        |                                                      |
| 6      | 2      | 84_F022 | <i>Entamoeba hartmanni</i>                                                       | <i>Nenyaviridae</i>                        |                                                      |
| 7      | 2      | 84_F033 | <i>Entamoeba dispar</i>                                                          | <i>Naryaviridae</i>                        |                                                      |
| 8      | 2      | 84_F059 | <i>Entamoeba dispar</i>                                                          | <i>Naryaviridae</i>                        | <i>Endolimax nana</i>                                |
| 9      | 2      | 84_F068 | <i>Entamoeba dispar</i>                                                          | <i>Naryaviridae</i>                        | <i>Blastocystis hominis</i>                          |
| 10     | 2      | 84_F069 | <i>Entamoeba dispar</i>                                                          | <i>Nenyaviridae</i>                        | <i>Endolimax nana</i>                                |
| 11     | 2      | 84_F070 | <i>Entamoeba coli</i><br><i>Entamoeba hartmanni</i>                              | <i>Naryaviridae</i>                        | <i>Endolimax nana</i>                                |
| 12     | 2      | 84_F079 | <i>Entamoeba hartmanni</i>                                                       | <i>Naryaviridae</i><br><i>Nenyaviridae</i> | <i>Blastocystis hominis</i><br><i>Endolimax nana</i> |
| 13     | 2      | 84_F098 | <i>Entamoeba</i>                                                                 | <i>Nenyaviridae</i>                        |                                                      |
| 14     | 2      | 84_F117 | <i>Entamoeba hartmanni</i>                                                       | <i>Naryaviridae</i><br><i>Nenyaviridae</i> |                                                      |
| 15     | 2      | 84_F130 | <i>Giardia duodenalis</i><br><i>Entamoeba coli</i>                               | <i>Vilyaviridae</i>                        | <i>Endolimax nana</i>                                |
| 16     | 2      | 84_F142 | <i>Entamoeba hartmanni</i>                                                       | <i>Nenyaviridae</i>                        | <i>Endolimax nana</i>                                |
| 17     | 2      | 84_F165 | <i>Entamoeba</i>                                                                 | <i>Naryaviridae</i>                        | <i>Endolimax nana</i>                                |
| 18     | 2      | 84_F175 | <i>Entamoeba hartmanni</i>                                                       | <i>Naryaviridae</i><br><i>Nenyaviridae</i> | <i>Endolimax nana</i>                                |
| 19     | 2      | 84_F186 | <i>Giardia duodenalis</i><br><i>Entamoeba coli</i><br><i>Entamoeba hartmanni</i> | <i>Vilyaviridae</i>                        | <i>Endolimax nana</i>                                |
| 20     | 2      | 84_F188 | <i>Entamoeba</i>                                                                 | <i>Naryaviridae</i><br><i>Nenyaviridae</i> |                                                      |
| 21     | 2      | 84_F198 | <i>Giardia duodenalis</i><br><i>Entamoeba hartmanni</i>                          | <i>Vilyaviridae</i>                        |                                                      |

**Supplementary Table 3. Viruses are related to both virus and parasite nucleotide sequences.** Top alignments of viral genomes and coding sequences are shown after BLASTn alignment to the NCBI non-redundant nucleotide database. Among top hits, several viruses aligned to both viral and parasite derived sequences.

| Virus species, isolate                              | Accession | Family       | Top hit                                                                                                                                                                | Accession      | Query coverage (%) | Identity (%) | E-value   |
|-----------------------------------------------------|-----------|--------------|------------------------------------------------------------------------------------------------------------------------------------------------------------------------|----------------|--------------------|--------------|-----------|
| Entamoeba-associated CRESS DNA virus 1, 84-AMS-01   | MT293410  | Naryaviridae | Entamoeba nuttalli P19 hypothetical protein partial mRNA                                                                                                               | XM_008862058.1 | 22                 | 78           | 2.00E-106 |
| Entamoeba-associated CRESS DNA virus 1, 84-AMS-02   | MT293411  | Naryaviridae | Entamoeba nuttalli P19 hypothetical protein partial mRNA                                                                                                               | XM_008862058.1 | 23                 | 80           | 5.00E-108 |
| Entamoeba-associated CRESS DNA virus 1, 94-AMS-01   | MT293412  | Naryaviridae | Entamoeba nuttalli P19 hypothetical protein partial mRNA                                                                                                               | XM_008862058.1 | 23                 | 79           | 1.00E-102 |
| Entamoeba-associated CRESS DNA virus 1, 84-AMS-03   | MT293413  | Naryaviridae | Entamoeba dispar SAW760 hypothetical protein EDI_137180 mRNA, complete cds                                                                                             | XM_001738173.1 | 18                 | 97           | 0         |
| Entamoeba-associated CRESS DNA virus 2, 84-AMS-01   | MT293414  | Naryaviridae | Unidentified circular ssDNA virus isolate cg6319, complete genome                                                                                                      | KU043415.1     | 31                 | 73           | 7.00E-81  |
| Entamoeba-associated CRESS DNA virus 2, 94-AMS-01   | MT293415  | Naryaviridae | Unidentified circular ssDNA virus isolate cg6319, complete genome                                                                                                      | KU043415.1     | 31                 | 69           | 1.00E-46  |
| Entamoeba-associated CRESS DNA virus 3, 84-AMS-01   | MT293416  | Nenyaviridae | Unidentified circular ssDNA virus clone V16C Rep and hypothetical protein genes, complete cds                                                                          | MG571899.1     | 86                 | 89           | 0         |
| Entamoeba-associated CRESS DNA virus 3, 84-AMS-02   | MT293417  | Nenyaviridae | Unidentified circular ssDNA virus clone V16C Rep and hypothetical protein genes, complete cds                                                                          | MG571899.1     | 86                 | 90           | 0         |
| Entamoeba-associated CRESS DNA virus 4, 84-AMS-01   | MT293418  | Nenyaviridae | Circoviridae sp. isolate ctga69, complete genome                                                                                                                       | MH617639.1     | 53                 | 78           | 0         |
| Entamoeba-associated CRESS DNA virus 4, 84-AMS-02   | MT293419  | Nenyaviridae | Circoviridae sp. isolate ctga69, complete genome                                                                                                                       | MH617639.1     | 53                 | 78           | 0         |
| Entamoeba-associated CRESS DNA virus 4, 84-AMS-03   | MT293420  | Nenyaviridae | Circoviridae sp. isolate ctga69, complete genome                                                                                                                       | MH617639.1     | 53                 | 78           | 0         |
| Giardia-associated CRESS DNA virus 1, 84-AMS-01     | MT293421  | Vilyaviridae | Giardia intestinalis putative replication-associated protein REP1 (REP1) and putative replication-associated protein REP2 (REP2) genes, complete cds; and unknown gene | AF059664.1     | 94                 | 73           | 0         |
| Giardia-associated CRESS DNA virus 1, 84-AMS-02     | MT293422  | Vilyaviridae | Giardia intestinalis putative replication-associated protein REP1 (REP1) and putative replication-associated protein REP2 (REP2) genes, complete cds; and unknown gene | AF059664.1     | 94                 | 73           | 0         |
| Giardia-associated CRESS DNA virus 1, 84-AMS-03     | MT293423  | Vilyaviridae | Giardia intestinalis putative replication-associated protein REP1 (REP1) and putative replication-associated protein REP2 (REP2) genes, complete cds; and unknown gene | AF059664.1     | 94                 | 73           | 0         |
| Giardia-associated CRESS DNA virus 1 CDS, 84-AMS-04 | MT293424  | Vilyaviridae | Giardia intestinalis putative replication-associated protein REP1 (REP1) and putative replication-associated protein REP2 (REP2) genes, complete cds; and unknown gene | AF059664.1     | 94                 | 68           | 1.00E-179 |
| Giardia-associated CRESS DNA virus 2, 84-AMS-01     | MT293425  | Vilyaviridae | Giardia intestinalis putative replication-associated protein REP1 (REP1) and putative replication-associated protein REP2 (REP2) genes, complete cds; and unknown gene | AF059664.1     | 57                 | 81           | 3.00E-167 |
| Giardia-associated CRESS DNA virus 2, 84-AMS-02     | MT293426  | Vilyaviridae | Virus NG10 replication-association protein (rep) gene, partial cds                                                                                                     | GQ404895.1     | 31                 | 92           | 0         |
| Giardia-associated CRESS DNA virus 3 CDS, 84-AMS-01 | MT293427  | Vilyaviridae | Uncultured virus clone CG97, complete genome                                                                                                                           | KY487991.1     | 88                 | 83           | 0         |
| Giardia-associated CRESS DNA virus 3, 84-AMS-02     | MT293428  | Vilyaviridae | Uncultured virus clone CG97, complete genome                                                                                                                           | KY487991.1     | 89                 | 95           | 0         |
| Giardia-associated CRESS DNA virus 4, 84-AMS-01     | MT293429  | Vilyaviridae | Feline stool-associated circular virus KU7 DNA, complete genome                                                                                                        | LC406405.1     | 60                 | 72           | 2.00E-126 |

**Supplementary Table 4. Viruses are related to both virus and parasite proteins.** Top alignments of viral genomes and coding sequences are shown after BLASTx alignment to the NCBI non-redundant protein database. Among top hits, viruses aligned to both viral and parasite derived sequences.

| Virus species, isolate                              | Accession | Family       | Top hit                                                                              | Accession      | Query coverage (%) | Identity (%) | E-value   |
|-----------------------------------------------------|-----------|--------------|--------------------------------------------------------------------------------------|----------------|--------------------|--------------|-----------|
| Entamoeba-associated CRESS DNA virus 1, 84-AMS-01   | MT293410  | Naryaviridae | hypothetical protein CL6EHI_168860 [Entamoeba histolytica]                           | GAT95322.1     | 41                 | 48           | 2.00E-75  |
| Entamoeba-associated CRESS DNA virus 1, 84-AMS-02   | MT293411  | Naryaviridae | hypothetical protein CL6EHI_168860 [Entamoeba histolytica]                           | GAT95322.1     | 42                 | 48           | 2.00E-77  |
| Entamoeba-associated CRESS DNA virus 1, 94-AMS-01   | MT293412  | Naryaviridae | hypothetical protein CL6EHI_168860 [Entamoeba histolytica]                           | GAT95322.1     | 42                 | 48           | 2.00E-77  |
| Entamoeba-associated CRESS DNA virus 1, 84-AMS-03   | MT293413  | Naryaviridae | hypothetical protein [Entamoeba dispar SAW760]                                       | XP_001738226.1 | 43                 | 63           | 2.00E-166 |
| Entamoeba-associated CRESS DNA virus 2, 84-AMS-01   | MT293414  | Naryaviridae | Hypothetical protein EHI5A_163890 [Entamoeba histolytica KU27]                       | EMD43492.1     | 45                 | 54           | 8.00E-90  |
| Entamoeba-associated CRESS DNA virus 2, 94-AMS-01   | MT293415  | Naryaviridae | Hypothetical protein EHI5A_163890 [Entamoeba histolytica KU27]                       | EMD43492.1     | 45                 | 54           | 5.00E-90  |
| Entamoeba-associated CRESS DNA virus 3, 84-AMS-01   | MT293416  | Nenyaviridae | hypothetical protein [unidentified circular ssDNA virus]                             | AWU66058.1     | 43                 | 86           | 0         |
| Entamoeba-associated CRESS DNA virus 3, 84-AMS-02   | MT293417  | Nenyaviridae | hypothetical protein [unidentified circular ssDNA virus]                             | AWU66058.1     | 43                 | 88           | 0         |
| Entamoeba-associated CRESS DNA virus 4, 84-AMS-01   | MT293418  | Nenyaviridae | helicase [Circoviridae sp.]                                                          | AXH77589.1     | 47                 | 85           | 0         |
| Entamoeba-associated CRESS DNA virus 4, 84-AMS-02   | MT293419  | Nenyaviridae | helicase [Circoviridae sp.]                                                          | AXH77589.1     | 47                 | 86           | 0         |
| Entamoeba-associated CRESS DNA virus 4, 84-AMS-03   | MT293420  | Nenyaviridae | helicase [Circoviridae sp.]                                                          | AXH77589.1     | 48                 | 86           | 0         |
| Giardia-associated CRESS DNA virus 1, 84-AMS-01     | MT293421  | Vilyaviridae | RNA helicase [Giardia intestinalis]                                                  | ESU34896.1     | 41                 | 73           | 2.00E-150 |
| Giardia-associated CRESS DNA virus 1, 84-AMS-02     | MT293422  | Vilyaviridae | RNA helicase [Giardia intestinalis]                                                  | ESU34896.1     | 41                 | 73           | 2.00E-150 |
| Giardia-associated CRESS DNA virus 1, 84-AMS-03     | MT293423  | Vilyaviridae | RNA helicase [Giardia intestinalis]                                                  | ESU34896.1     | 41                 | 73           | 3.00E-151 |
| Giardia-associated CRESS DNA virus 1 CDS, 84-AMS-04 | MT293424  | Vilyaviridae | RNA helicase [Giardia intestinalis]                                                  | ESU34896.1     | 42                 | 71           | 1.00E-138 |
| Giardia-associated CRESS DNA virus 2, 84-AMS-01     | MT293425  | Vilyaviridae | helicase [CRESS virus sp.]                                                           | AYP28739.1     | 41                 | 63           | 2.00E-126 |
| Giardia-associated CRESS DNA virus 2, 84-AMS-02     | MT293426  | Vilyaviridae | replication-association protein [Virus NG10]                                         | ADF80742.1     | 30                 | 94           | 6.00E-138 |
| Giardia-associated CRESS DNA virus 3 CDS, 84-AMS-01 | MT293427  | Vilyaviridae | Rep [uncultured virus]                                                               | AUM62049.1     | 45                 | 97           | 0         |
| Giardia-associated CRESS DNA virus 3, 84-AMS-02     | MT293428  | Vilyaviridae | Rep [uncultured virus]                                                               | AUM62049.1     | 44                 | 97           | 0         |
| Giardia-associated CRESS DNA virus 4, 84-AMS-01     | MT293429  | Vilyaviridae | putative replication associated protein [Feline stool-associated circular virus KU9] | BBF24945.1     | 41                 | 75           | 1.00E-155 |



**Supplementary Table 5. Whole and partial integrations of virus genomes in parasite genomes.** Top alignments of viral genomes and coding sequences are shown after BLASTn alignment to parasite whole-genome shotgun contigs databases. This reveals several complete (i.e. high coverage) and partial whole genome integrations.

| Virus species, isolate                              | Accession | Family       | Top hit                                                                                                 | Accession      | Query coverage (%) | Identity (%) | E-value   |
|-----------------------------------------------------|-----------|--------------|---------------------------------------------------------------------------------------------------------|----------------|--------------------|--------------|-----------|
| Entamoeba-associated CRESS DNA virus 1, 84-AMS-01   | MT293410  | Naryaviridae | Entamoeba dispar SAW760 gcontig_1104316507336, whole genome shotgun sequence                            | AANV02000527.1 | 47                 | 77.29        | 0         |
| Entamoeba-associated CRESS DNA virus 1, 84-AMS-02   | MT293411  | Naryaviridae | Entamoeba dispar SAW760 gcontig_1104316507336, whole genome shotgun sequence                            | AANV02000527.1 | 47                 | 77.59        | 0         |
| Entamoeba-associated CRESS DNA virus 1, 94-AMS-01   | MT293412  | Naryaviridae | Entamoeba dispar SAW760 gcontig_1104316507336, whole genome shotgun sequence                            | AANV02000527.1 | 47                 | 77.36        | 0         |
| Entamoeba-associated CRESS DNA virus 1, 84-AMS-03   | MT293413  | Naryaviridae | Entamoeba dispar SAW760 gcontig_1104316507336, whole genome shotgun sequence                            | AANV02000527.1 | 100                | 84.25        | 0         |
| Entamoeba-associated CRESS DNA virus 2, 84-AMS-01   | MT293414  | Naryaviridae | Entamoeba histolytica KU27 contig_1714, whole genome shotgun sequence                                   | AOSC01001714.1 | 34                 | 64.61        | 4.00E-17  |
| Entamoeba-associated CRESS DNA virus 2, 94-AMS-01   | MT293415  | Naryaviridae | Entamoeba histolytica KU27 contig_1714, whole genome shotgun sequence                                   | AOSC01001714.1 | 34                 | 64.3         | 2.00E-14  |
| Entamoeba-associated CRESS DNA virus 3, 84-AMS-01   | MT293416  | Nenyaviridae | Entamoeba invadens IP1 contig_3312, whole genome shotgun sequence                                       | AANW03003312.1 | 2                  | 88.33        | 1.00E-09  |
| Entamoeba-associated CRESS DNA virus 3, 84-AMS-02   | MT293417  | Nenyaviridae | Entamoeba invadens IP1 contig_3312, whole genome shotgun sequence                                       | AANW03003312.1 | 2                  | 88.33        | 1.00E-09  |
| Entamoeba-associated CRESS DNA virus 4, 84-AMS-01   | MT293418  | Nenyaviridae | NS                                                                                                      | NS             | NS                 | NS           | NS        |
| Entamoeba-associated CRESS DNA virus 4, 84-AMS-02   | MT293419  | Nenyaviridae | NS                                                                                                      | NS             | NS                 | NS           | NS        |
| Entamoeba-associated CRESS DNA virus 4, 84-AMS-03   | MT293420  | Nenyaviridae | NS                                                                                                      | NS             | NS                 | NS           | NS        |
| Giardia-associated CRESS DNA virus 1, 84-AMS-01     | MT293421  | Vilyaviridae | Giardia intestinalis strain DH DH_A2_0009, whole genome shotgun sequence                                | AHGT01000120.1 | 99                 | 73.16        | 0         |
| Giardia-associated CRESS DNA virus 1, 84-AMS-02     | MT293422  | Vilyaviridae | Giardia intestinalis assemblage A WGS project CAHQ00000000                                              | CAHQ01000875.1 | 94                 | 73.14        | 0         |
| Giardia-associated CRESS DNA virus 1, 84-AMS-03     | MT293423  | Vilyaviridae | Giardia intestinalis strain DH DH_A2_0009, whole genome shotgun sequence                                | AHGT01000120.1 | 99                 | 72.7         | 0         |
| Giardia-associated CRESS DNA virus 1 CDS, 84-AMS-04 | MT293424  | Vilyaviridae | Giardia intestinalis assemblage A WGS project CAHQ00000000                                              | CAHQ01000875.1 | 95                 | 68.46        | 0         |
| Giardia-associated CRESS DNA virus 2, 84-AMS-01     | MT293425  | Vilyaviridae | Giardia intestinalis assemblage A WGS project CAHQ00000000                                              | CAHQ01000943.1 | 30                 | 81.49        | 1.00E-171 |
| Giardia-associated CRESS DNA virus 2, 84-AMS-02     | MT293426  | Vilyaviridae | Giardia intestinalis assemblage A WGS project CAHQ00000000                                              | CAHQ01001040.1 | 44                 | 72.16        | 6.00E-125 |
| Giardia-associated CRESS DNA virus 3 CDS, 84-AMS-01 | MT293427  | Vilyaviridae | Giardia intestinalis ATCC 50581 strain GS/M clone H7 contig2341, whole genome shotgun sequence          | ACGJ01002178.1 | 75                 | 73.07        | 0         |
| Giardia-associated CRESS DNA virus 3, 84-AMS-02     | MT293428  | Vilyaviridae | Giardia intestinalis ATCC 50581 strain GS/M clone H7 contig3001, whole genome shotgun sequence          | ACGJ01002837.1 | 60                 | 76.33        | 0         |
| Giardia-associated CRESS DNA virus 4, 84-AMS-01     | MT293429  | Vilyaviridae | Giardia intestinalis isolate AS98 genome assembly, contig: AS98_contig22, whole genome shotgun sequence | CVLA01000027.1 | 66                 | 67.19        | 6.00E-80  |

**Supplementary Table 6. CRESS integrations in *Entamoeba* are shared among multiple independent genome assemblies.** Sequences from endogenous viral elements (columns) were queried against available assemblies of *E. histolytica* (rows) using BLASTn, revealing a wide distribution among independent parasite isolates (implying these are not artefacts of genome assemblies). ND = not done (since the assembly was also the source of the integration), NS = not significant (1e-10 cutoff).

| Subject assemblies<br>(accession,<br>isolate,<br>place and year of isolation) | Information<br>(reference,<br>assembly total length,<br>contig count & contig N50) | Endogenous viral element query sequences                                                                                                                                  |                                                                                                     |                                                                                                     |                                                                                                     |                                                                                                          |                                                                                                           |                                                                          |                                                                                          |                                                                                 |
|-------------------------------------------------------------------------------|------------------------------------------------------------------------------------|---------------------------------------------------------------------------------------------------------------------------------------------------------------------------|-----------------------------------------------------------------------------------------------------|-----------------------------------------------------------------------------------------------------|-----------------------------------------------------------------------------------------------------|----------------------------------------------------------------------------------------------------------|-----------------------------------------------------------------------------------------------------------|--------------------------------------------------------------------------|------------------------------------------------------------------------------------------|---------------------------------------------------------------------------------|
|                                                                               |                                                                                    | <i>E. histolytica</i> isolate<br>Molecule type<br>Isolation place and year<br>Assembly accession<br>Contig accession<br>EVE protein accession<br>EVE nucleotide accession | HM-1:IMSS<br>DNA<br>Mexico, 1967<br>GCA_000208925.2<br>NW_001915013.1<br>XP_652805.2<br>XM_647713.2 | HM-1:IMSS<br>DNA<br>Mexico, 1967<br>GCA_000208925.2<br>NW_001915013.1<br>XP_652803.1<br>XM_647711.1 | HM-1:IMSS<br>DNA<br>Mexico, 1967<br>GCA_000208925.2<br>NW_001915253.1<br>XP_648754.1<br>XM_643662.1 | KU27<br>DNA<br>Japan, 2001<br>GCA_000338855.1<br>KB445521.1<br>EMD42418.1<br>NA (nt sequence is partial) | HM-1:IMSS<br>DNA<br>Mexico, 1967<br>GCA_000208925.2<br>NW_001915135.1<br>XP_001914113.1<br>XM_001914078.1 | HM-1:IMSS<br>RNA<br>Mexico, 1967<br>NA<br>CX089530.1<br>NA<br>CX089530.1 | HM1:IMSS<br>DNA<br>Mexico, 1967<br>GCA_001662325.1<br>BDEQ01000001.1<br>GAT95322.1<br>NA | KU27<br>DNA<br>Japan, 2001<br>GCA_000338855.1<br>KB445272.1<br>EMD43492.1<br>NA |
| GCA_000208925.2<br><i>E. histolytica</i> HM-1:IMSS<br>Mexico, 1967            | Lorenzi et al 2010<br>20.8 Mb<br>2,172 (29 Kb)                                     | Best hit contig                                                                                                                                                           | ND                                                                                                  | ND                                                                                                  | ND                                                                                                  | NW_001915456.1                                                                                           | ND                                                                                                        | NW_001915456.1                                                           | NW_001914934.1                                                                           | NW_001914934.1                                                                  |
|                                                                               |                                                                                    | Query coverage                                                                                                                                                            | ND                                                                                                  | ND                                                                                                  | ND                                                                                                  | 100                                                                                                      | ND                                                                                                        | 100                                                                      | 100                                                                                      | 100                                                                             |
|                                                                               |                                                                                    | Identity                                                                                                                                                                  | ND                                                                                                  | ND                                                                                                  | ND                                                                                                  | 99.44                                                                                                    | ND                                                                                                        | 99.64                                                                    | 100                                                                                      | 99.89                                                                           |
| GCA_001662325.1<br><i>E. histolytica</i> HM1:IMSS clone 6<br>Mexico, 1967     | 19.9 Mb<br>NA (concatenated)                                                       | Best hit contig                                                                                                                                                           | BDEQ01000001.1                                                                                      | BDEQ01000001.1                                                                                      | BDEQ01000001.1                                                                                      | BDEQ01000001.1                                                                                           | BDEQ01000001.1                                                                                            | BDEQ01000001.1                                                           | ND                                                                                       | BDEQ01000001.1                                                                  |
|                                                                               |                                                                                    | Query coverage                                                                                                                                                            | 100                                                                                                 | 100                                                                                                 | 100                                                                                                 | 100                                                                                                      | 100                                                                                                       | 100                                                                      | ND                                                                                       | 100                                                                             |
|                                                                               |                                                                                    | Identity                                                                                                                                                                  | 88.67                                                                                               | 100                                                                                                 | 99.83                                                                                               | 99.44                                                                                                    | 100                                                                                                       | 99.64                                                                    | ND                                                                                       | 99.89                                                                           |
| GCA_000365475.1<br><i>E. histolytica</i> HM-1:IMSS-A<br>Lab strain, Germany   | 12.3 Mb<br>1,691 (9 Kb)                                                            | Best hit contig                                                                                                                                                           | NS                                                                                                  | NS                                                                                                  | NS                                                                                                  | NS                                                                                                       | NS                                                                                                        | NS                                                                       | KB823243.1                                                                               | KB823243.1                                                                      |
|                                                                               |                                                                                    | Query coverage                                                                                                                                                            | NS                                                                                                  | NS                                                                                                  | NS                                                                                                  | NS                                                                                                       | NS                                                                                                        | NS                                                                       | 100                                                                                      | 100                                                                             |
|                                                                               |                                                                                    | Identity                                                                                                                                                                  | NS                                                                                                  | NS                                                                                                  | NS                                                                                                  | NS                                                                                                       | NS                                                                                                        | NS                                                                       | 100                                                                                      | 99.89                                                                           |
| GCA_000338855.1<br><i>E. histolytica</i> KU27<br>Japan, 2001                  | 15.3 Mb<br>3,228 (9 Kb)                                                            | Best hit contig                                                                                                                                                           | KB445248.1                                                                                          | KB443944.1                                                                                          | KB445521.1                                                                                          | ND                                                                                                       | KB445521.1                                                                                                | KB445521.1                                                               | KB445272.1                                                                               | ND                                                                              |
|                                                                               |                                                                                    | Query coverage                                                                                                                                                            | 100                                                                                                 | 100                                                                                                 | 100                                                                                                 | ND                                                                                                       | 100                                                                                                       | 100                                                                      | 100                                                                                      | ND                                                                              |
|                                                                               |                                                                                    | Identity                                                                                                                                                                  | 88.67                                                                                               | 100                                                                                                 | 99.33                                                                                               | ND                                                                                                       | 99.44                                                                                                     | 99.52                                                                    | 99.89                                                                                    | ND                                                                              |
| GCA_000344925.1<br><i>E. histolytica</i> HM-1:IMSS-B<br>Lab strain, Germany   | 12.8 Mb<br>2,283 (8.6 Kb)                                                          | Best hit contig                                                                                                                                                           | NS                                                                                                  | NS                                                                                                  | NS                                                                                                  | NS                                                                                                       | NS                                                                                                        | NS                                                                       | NS                                                                                       | NS                                                                              |
|                                                                               |                                                                                    | Query coverage                                                                                                                                                            | NS                                                                                                  | NS                                                                                                  | NS                                                                                                  | NS                                                                                                       | NS                                                                                                        | NS                                                                       | NS                                                                                       | NS                                                                              |
|                                                                               |                                                                                    | Identity                                                                                                                                                                  | NS                                                                                                  | NS                                                                                                  | NS                                                                                                  | NS                                                                                                       | NS                                                                                                        | NS                                                                       | NS                                                                                       | NS                                                                              |
| GCA_000346345.1<br><i>E. histolytica</i> HM-3:IMSS<br>Mexico, 1972            | 13.8 Mb<br>3,428 (7 Kb)                                                            | Best hit contig                                                                                                                                                           | KB638588.1                                                                                          | NS                                                                                                  | KB637742.1                                                                                          | KB637742.1                                                                                               | KB637742.1                                                                                                | KB637742.1                                                               | KB638686.1                                                                               | KB638686.1                                                                      |
|                                                                               |                                                                                    | Query coverage                                                                                                                                                            | 100                                                                                                 | NS                                                                                                  | 100                                                                                                 | 100                                                                                                      | 100                                                                                                       | 98                                                                       | 100                                                                                      | 100                                                                             |
|                                                                               |                                                                                    | Identity                                                                                                                                                                  | 88.55                                                                                               | NS                                                                                                  | 99.5                                                                                                | 99.44                                                                                                    | 100                                                                                                       | 99.51                                                                    | 99.89                                                                                    | 100                                                                             |

**Supplementary Table 7. CRESS integrations in *Giardia* are shared among multiple independent genome assemblies.** Sequences from endogenous viral elements (columns) were queried against available assemblies of *G. duodenalis* (rows) using BLASTn, revealing a wide but lineage-specific distribution among independent parasite isolates (implying these are not artefacts of genome assemblies). ND = not done (since the assembly was also the source of the integration), NS = not significant (1e-10 cutoff).

|                                                                                         |                                                                                    | Endogenous viral element query sequences |                          |                          |                   |                   |                   |                   |                   |                   |                 |                   |
|-----------------------------------------------------------------------------------------|------------------------------------------------------------------------------------|------------------------------------------|--------------------------|--------------------------|-------------------|-------------------|-------------------|-------------------|-------------------|-------------------|-----------------|-------------------|
|                                                                                         |                                                                                    | <i>G. duodenalis</i> isolate             | DH                       | DH                       | BRIS/92/HEPU/1541 | BRIS/92/HEPU/1541 | GS                | GS                | GS                | GS                | BAH15c1         | GS                |
|                                                                                         |                                                                                    | Molecule type                            | DNA                      | DNA                      | DNA               | DNA               | DNA               | DNA               | DNA               | DNA               | DNA             | DNA               |
|                                                                                         |                                                                                    | Isolation place and year                 | West Virginia, USA, 1985 | West Virginia, USA, 1985 | Australia, 1992   | Australia, 1992   | Alaska, USA, 1985 | Alaska, USA, 1985 | Alaska, USA, 1985 | Alaska, USA, 1985 | Australia       | Alaska, USA, 1985 |
| Subject assemblies<br>(accession,<br>isolate & lineage,<br>place and year of isolation) | Information<br>(reference,<br>assembly total length,<br>contig count & contig N50) | Assembly accession                       | GCA_000498715.1          | GCA_000498715.1          | NA                | NA                | GCA_000182405.1   | GCA_000498735.1   | GCA_000498735.1   | GCA_000182405.1   | GCA_001543975.1 | GCA_000498735.1   |
|                                                                                         |                                                                                    | Contig accession                         | AHGT01000120.1           | AHGT01000120.1           | AF059664.1        | AF059664.1        | ACGJ01002837.1    | AHHH01000265.1    | AHHH01000265.1    | ACGJ01002178.1    | JXTI01000402.1  | AHHH01000424.1    |
|                                                                                         |                                                                                    | EVE protein accession                    | ESU34896.1               | ESU34895.1               | AAF28772.1        | AAF28770.1        | EES99432.1        | ESU40270.1        | ESU40268.1        | EET01110.1        | KWX11074.1      | ESU39907.1        |
|                                                                                         |                                                                                    | EVE nucleotide accession                 | NA                       | NA                       | NA                | NA                | NA                | NA                | NA                | NA                | NA              | NA                |
|                                                                                         |                                                                                    | Best hit contig                          | NS                       | NS                       | NS                | NS                | NS                | NS                | NS                | NS                | NS              | NS                |
|                                                                                         |                                                                                    | Query coverage                           | NS                       | NS                       | NS                | NS                | NS                | NS                | NS                | NS                | NS              | NS                |
|                                                                                         |                                                                                    | Identity                                 | NS                       | NS                       | NS                | NS                | NS                | NS                | NS                | NS                | NS              | NS                |
| GCA_000002435.2<br><i>G. duodenalis</i> WB (lineage A1)<br>Maryland, USA, 1979          | Xu et al. 2020.<br>12.1 Mb<br>38 (2,761 Kb)                                        | Best hit contig                          | NS                       | NS                       | NS                | NS                | NS                | NS                | NS                | NS                | NS              | NS                |
| GCA_009192825.1<br><i>G. duodenalis</i> ZX15 (lineage A1)<br>Czech Republic, 2015       | Weisz et al. 2019.<br>10.3 Mb<br>611 (57 Kb)                                       | Query coverage                           | NS                       | NS                       | NS                | NS                | NS                | NS                | NS                | NS                | NS              | NS                |
| GCA_011634545.1<br><i>G. duodenalis</i> WB (lineage A1)<br>Maryland, USA, 1979          | Pollo et al. 2020<br>11.7 Mb<br>37 (616 Kb)                                        | Identity                                 | NS                       | NS                       | NS                | NS                | NS                | NS                | NS                | NS                | NS              | NS                |
| GCA_000498715.1<br><i>G. duodenalis</i> DH (lineage A2)<br>West Virginia, USA, 1985     | Adam et al. 2013.<br>10.7 Mb<br>239 (117 Kb)                                       | Best hit contig                          | ND                       | ND                       | AHGT01000120.1    | AHGT01000120.1    | AHGT01000120.1    | AHGT01000120.1    | AHGT01000120.1    | AHGT01000120.1    | NS              | NS                |
| GCA_001493575.1<br><i>G. duodenalis</i> AS175 (lineage A2)<br>Sweden                    | Ankarklev et al. 2015<br>10.5 Mb<br>1139 (57 Kb)                                   | Query coverage                           | ND                       | ND                       | 100               | 100               | 43                | 33                | 40                | 41                | NS              | NS                |
| CVLA00000000.1<br><i>G. duodenalis</i> AS98 (lineage A2)<br>Sweden                      | Ankarklev et al. 2015<br>10.3 Mb<br>914 (43Kb)                                     | Identity                                 | ND                       | ND                       | 99.67             | 99.83             | 75.73             | 73.26             | 74.6              | 73.81             | NS              | NS                |
| GCA_000182405.1<br><i>G. duodenalis</i> GS (lineage B)<br>Alaska, USA, 1985             | Franzén et al. 2009<br>11 Mb<br>2931 (34 Kb)                                       | Best hit contig                          | CAHQ01000875.1           | CAHQ01000943.1           | CAHQ01000875.1    | CAHQ01000943.1    | CAHQ01001040.1    | CAHQ01001083.1    | CAHQ01001083.1    | CAHQ01001083.1    | NS              | NS                |
| GCA_000498735.1<br><i>G. duodenalis</i> GS (lineage B)<br>Alaska, USA, 1985             | Adam et al. 2013<br>12 Mb<br>543 (58 Kb)                                           | Query coverage                           | 100                      | 96                       | 100               | 96                | 77                | 39                | 40                | 42                | NS              | NS                |
| GCA_011634595.1<br><i>G. duodenalis</i> GS (lineage B)<br>Alaska, USA, 1985             | Pollo et al. 2020<br>13.2 Mb<br>19 (1,645 Kb)                                      | Identity                                 | 99.89                    | 99.46                    | 99.78             | 99.28             | 71.29             | 72.88             | 75.93             | 74.94             | NS              | NS                |
| GCA_001543975.1<br><i>G. duodenalis</i> BAH15c1 (lineage B)<br>Australia                | Wielinga et al. 2015<br>10.4 Mb<br>708 (33 Kb)                                     | Best hit contig                          | CVLA01000027.1           | CVLA01000027.1           | CVLA01000027.1    | CVLA01000027.1    | NS                | NS                | NS                | NS                | NS              | NS                |
| GCA_000182405.1<br><i>G. duodenalis</i> P15 (lineage E)<br>Czech Republic, 1991         | Jerlström-Hultqvist et al. 2010<br>11.5 Mb<br>820 (71 Kb)                          | Query coverage                           | 100                      | 100                      | 100               | 100               | NS                | NS                | NS                | NS                | NS              | NS                |
|                                                                                         |                                                                                    | Identity                                 | 99.89                    | 99.83                    | 99.78             | 99.65             | NS                | NS                | NS                | NS                | NS              | NS                |
|                                                                                         |                                                                                    | Best hit contig                          | ACGJ01000559.1           | ACGJ01002837.1           | ACGJ01000559.1    | ACGJ01002837.1    | ND                | ACGJ01002500.1    | ACGJ01002178.1    | ND                | ACGJ01002413.1  | ACGJ01002413.1    |
|                                                                                         |                                                                                    | Query coverage                           | 34                       | 65                       | 33                | 65                | ND                | 94                | 92                | ND                | 100             | 100               |
|                                                                                         |                                                                                    | Identity                                 | 68.73                    | 75.73                    | 68.73             | 75.47             | ND                | 99.28             | 99.07             | ND                | 94.87           | 100               |
|                                                                                         |                                                                                    | Best hit contig                          | NS                       | AHHH01000265.1           | NS                | AHHH01000265.1    | AHHH01000413.1    | ND                | ND                | AHHH01000265.1    | AHHH01000424.1  | ND                |
|                                                                                         |                                                                                    | Query coverage                           | NS                       | 65                       | NS                | 65                | 38                | ND                | ND                | 100               | 100             | ND                |
|                                                                                         |                                                                                    | Identity                                 | NS                       | 74.6                     | NS                | 74.34             | 92.74             | ND                | ND                | 99.07             | 94.87           | ND                |
|                                                                                         |                                                                                    | Best hit contig                          | VSRU01000007.1           | VSRU01000007.1           | VSRU01000007.1    | VSRU01000007.1    | VSRU01000007.1    | VSRU01000012.1    | VSRU01000012.1    | VSRU01000012.1    | VSRU01000009.1  | VSRU01000009.1    |
|                                                                                         |                                                                                    | Query coverage                           | 34                       | 65                       | 33                | 65                | 100               | 100               | 100               | 100               | 100             | 100               |
|                                                                                         |                                                                                    | Identity                                 | 68.95                    | 76.06                    | 68.95             | 75.8              | 99.78             | 99.91             | 100               | 100               | 94.87           | 100               |
|                                                                                         |                                                                                    | Best hit contig                          | NS                       | NS                       | NS                | NS                | NS                | NS                | NS                | NS                | ND              | JXTI01000402.1    |
|                                                                                         |                                                                                    | Query coverage                           | NS                       | NS                       | NS                | NS                | NS                | NS                | NS                | NS                | ND              | 100               |
|                                                                                         |                                                                                    | Identity                                 | NS                       | NS                       | NS                | NS                | NS                | NS                | NS                | NS                | ND              | 94.87             |
|                                                                                         |                                                                                    | Best hit contig                          | NS                       | NS                       | NS                | NS                | NS                | NS                | NS                | NS                | NS              | NS                |
|                                                                                         |                                                                                    | Query coverage                           | NS                       | NS                       | NS                | NS                | NS                | NS                | NS                | NS                | NS              | NS                |
|                                                                                         |                                                                                    | Identity                                 | NS                       | NS                       | NS                | NS                | NS                | NS                | NS                | NS                | NS              | NS                |

**Supplementary Table 8. Delimitation of CRESS virus genera.** Genera infecting the same host genus were assigned a Greek number and named with reference to the host. Pairwise comparisons of Rep proteins were done using SIAS (available at: <http://imed.med.ucm.es/Tools/sias.html>), using mean length of the sequences as the denominator. A cutoff of 50% protein identity was used for genus delimitation, following a recent literature example<sup>8</sup>.

| Family              | Virus                                                   | Genus            | Sequence number | S1  | S2  | S3  | S4  | S5  | S6  | S7  | S8  | S9  | S10 | S11 | S12 | S13 | S14 | S15 | S16 | S17 | S18 | S19 | S20 |
|---------------------|---------------------------------------------------------|------------------|-----------------|-----|-----|-----|-----|-----|-----|-----|-----|-----|-----|-----|-----|-----|-----|-----|-----|-----|-----|-----|-----|
| <i>Naryaviridae</i> | Entamoeba-associated CRESS DNA virus 1, 84-AMS-01 rep   | Protoentivirus   | S1              | 100 | 93  | 93  | 77  | 42  | 42  | 21  | 20  | 19  | 19  | 19  | 21  | 20  | 20  | 21  | 25  | 25  | 23  | 21  | 20  |
| <i>Naryaviridae</i> | Entamoeba-associated CRESS DNA virus 1, 84-AMS-02 rep   | Protoentivirus   | S2              | 93  | 100 | 100 | 77  | 41  | 41  | 22  | 21  | 19  | 19  | 19  | 21  | 20  | 20  | 20  | 25  | 25  | 22  | 21  | 19  |
| <i>Naryaviridae</i> | Entamoeba-associated CRESS DNA virus 1, 94-AMS-01 rep   | Protoentivirus   | S3              | 93  | 100 | 100 | 77  | 41  | 41  | 22  | 21  | 19  | 19  | 19  | 21  | 20  | 20  | 20  | 25  | 25  | 22  | 21  | 19  |
| <i>Naryaviridae</i> | Entamoeba-associated CRESS DNA virus 1, 84-AMS-03 rep   | Protoentivirus   | S4              | 77  | 77  | 77  | 100 | 42  | 43  | 19  | 19  | 20  | 20  | 20  | 19  | 21  | 21  | 21  | 24  | 24  | 21  | 20  | 19  |
| <i>Naryaviridae</i> | Entamoeba-associated CRESS DNA virus 2, 84-AMS-01 rep   | Deuteroentivirus | S5              | 42  | 41  | 41  | 42  | 100 | 100 | 21  | 21  | 22  | 22  | 22  | 19  | 20  | 20  | 20  | 21  | 21  | 22  | 19  | 18  |
| <i>Naryaviridae</i> | Entamoeba-associated CRESS DNA virus 2, 94-AMS-01 rep   | Deuteroentivirus | S6              | 42  | 41  | 41  | 43  | 100 | 100 | 21  | 21  | 22  | 22  | 22  | 19  | 20  | 20  | 20  | 21  | 21  | 22  | 19  | 18  |
| <i>Nenyaviridae</i> | Entamoeba-associated CRESS DNA virus 3, 84-AMS-01 rep   | Tritoentivirus   | S7              | 21  | 22  | 22  | 19  | 21  | 21  | 100 | 94  | 48  | 48  | 48  | 21  | 22  | 22  | 22  | 23  | 23  | 22  | 24  | 25  |
| <i>Nenyaviridae</i> | Entamoeba-associated CRESS DNA virus 3, 84-AMS-02 rep   | Tritoentivirus   | S8              | 20  | 21  | 21  | 19  | 21  | 21  | 94  | 100 | 46  | 47  | 47  | 21  | 22  | 22  | 22  | 23  | 23  | 22  | 24  | 25  |
| <i>Nenyaviridae</i> | Entamoeba-associated CRESS DNA virus 4, 84-AMS-01 rep   | Tetartoentivirus | S9              | 19  | 19  | 19  | 20  | 22  | 22  | 48  | 46  | 100 | 100 | 100 | 22  | 22  | 22  | 22  | 23  | 23  | 19  | 22  | 22  |
| <i>Nenyaviridae</i> | Entamoeba-associated CRESS DNA virus 4, 84-AMS-02 rep   | Tetartoentivirus | S10             | 19  | 19  | 19  | 20  | 22  | 22  | 48  | 47  | 100 | 100 | 100 | 22  | 22  | 22  | 22  | 23  | 23  | 19  | 22  | 22  |
| <i>Nenyaviridae</i> | Entamoeba-associated CRESS DNA virus 4, 84-AMS-03 rep   | Tetartoentivirus | S11             | 19  | 19  | 19  | 20  | 22  | 22  | 48  | 47  | 100 | 100 | 100 | 22  | 22  | 22  | 22  | 23  | 23  | 19  | 22  | 22  |
| <i>Vilyaviridae</i> | Giardia-associated CRESS DNA virus 1 CDS, 84-AMS-04 rep | Protogiavirus    | S12             | 21  | 21  | 21  | 19  | 19  | 19  | 21  | 21  | 22  | 22  | 22  | 100 | 68  | 68  | 68  | 51  | 51  | 49  | 41  | 38  |
| <i>Vilyaviridae</i> | Giardia-associated CRESS DNA virus 1, 84-AMS-01 rep     | Protogiavirus    | S13             | 20  | 20  | 20  | 21  | 20  | 20  | 22  | 22  | 22  | 22  | 22  | 68  | 100 | 100 | 99  | 49  | 49  | 49  | 48  | 44  |
| <i>Vilyaviridae</i> | Giardia-associated CRESS DNA virus 1, 84-AMS-02 rep     | Protogiavirus    | S14             | 20  | 20  | 20  | 21  | 20  | 20  | 22  | 22  | 22  | 22  | 22  | 68  | 100 | 100 | 99  | 49  | 49  | 49  | 48  | 44  |
| <i>Vilyaviridae</i> | Giardia-associated CRESS DNA virus 1, 84-AMS-03 rep     | Protogiavirus    | S15             | 21  | 20  | 20  | 21  | 20  | 20  | 22  | 22  | 22  | 22  | 22  | 68  | 99  | 99  | 100 | 50  | 50  | 49  | 49  | 45  |
| <i>Vilyaviridae</i> | Giardia-associated CRESS DNA virus 3 CDS, 84-AMS-01 rep | Deuteroentivirus | S16             | 25  | 25  | 25  | 24  | 21  | 21  | 23  | 23  | 23  | 23  | 23  | 51  | 49  | 49  | 50  | 100 | 100 | 62  | 43  | 43  |
| <i>Vilyaviridae</i> | Giardia-associated CRESS DNA virus 3, 84-AMS-02 rep     | Deuteroentivirus | S17             | 25  | 25  | 25  | 24  | 21  | 21  | 23  | 23  | 23  | 23  | 23  | 51  | 49  | 49  | 50  | 100 | 100 | 61  | 43  | 43  |
| <i>Vilyaviridae</i> | Giardia-associated CRESS DNA virus 4, 84-AMS-01 rep     | Deuteroentivirus | S18             | 23  | 22  | 22  | 21  | 22  | 22  | 22  | 22  | 19  | 19  | 19  | 49  | 49  | 49  | 49  | 62  | 61  | 100 | 40  | 40  |
| <i>Vilyaviridae</i> | Giardia-associated CRESS DNA virus 2, 84-AMS-01 rep     | Tritogiavirus    | S19             | 21  | 21  | 21  | 20  | 19  | 19  | 24  | 24  | 22  | 22  | 22  | 41  | 48  | 48  | 49  | 43  | 43  | 40  | 100 | 84  |
| <i>Vilyaviridae</i> | Giardia-associated CRESS DNA virus 2, 84-AMS-02 rep     | Tritogiavirus    | S20             | 20  | 19  | 19  | 19  | 18  | 18  | 25  | 25  | 22  | 22  | 22  | 38  | 44  | 44  | 45  | 43  | 43  | 40  | 84  | 100 |

**Supplementary Table 9. Host and virus GC-content.** Host-virus relationships were found using the Virus-Host DB, and GC-content was retrieved from genome assemblies available in the NCBI genome assemblies database.

| <b>CRESS family</b> | <b>Virus species</b>                                                            | <b>Accession(s)</b> | <b>Virus GC percentage</b> | <b>Selected reference host</b> | <b>Host accession</b> | <b>Host GC percentage</b> |
|---------------------|---------------------------------------------------------------------------------|---------------------|----------------------------|--------------------------------|-----------------------|---------------------------|
| Naryaviridae        | Entamoeba-associated CRESS DNA virus 1, 84-AMS-01                               | MT293410            | 36.84                      | Entamoeba histolytica          | AAFB00000000.2        | 25.20                     |
| Naryaviridae        | Entamoeba-associated CRESS DNA virus 1, 84-AMS-02                               | MT293411            | 37.03                      | Entamoeba histolytica          | AAFB00000000.2        | 25.20                     |
| Naryaviridae        | Entamoeba-associated CRESS DNA virus 1, 94-AMS-01                               | MT293412            | 37.52                      | Entamoeba histolytica          | AAFB00000000.2        | 25.20                     |
| Naryaviridae        | Entamoeba-associated CRESS DNA virus 1, 84-AMS-03                               | MT293413            | 35.05                      | Entamoeba histolytica          | AAFB00000000.2        | 25.20                     |
| Naryaviridae        | Entamoeba-associated CRESS DNA virus 2, 84-AMS-01                               | MT293414            | 36.74                      | Entamoeba histolytica          | AAFB00000000.2        | 25.20                     |
| Naryaviridae        | Entamoeba-associated CRESS DNA virus 2, 94-AMS-01                               | MT293415            | 37.36                      | Entamoeba histolytica          | AAFB00000000.2        | 25.20                     |
| Nenyaviridae        | Entamoeba-associated CRESS DNA virus 3, 84-AMS-01                               | MT293416            | 42.75                      | Entamoeba histolytica          | AAFB00000000.2        | 25.20                     |
| Nenyaviridae        | Entamoeba-associated CRESS DNA virus 3, 84-AMS-02                               | MT293417            | 42.74                      | Entamoeba histolytica          | AAFB00000000.2        | 25.20                     |
| Nenyaviridae        | Entamoeba-associated CRESS DNA virus 4, 84-AMS-01                               | MT293418            | 41.84                      | Entamoeba histolytica          | AAFB00000000.2        | 25.20                     |
| Nenyaviridae        | Entamoeba-associated CRESS DNA virus 4, 84-AMS-02                               | MT293419            | 39.86                      | Entamoeba histolytica          | AAFB00000000.2        | 25.20                     |
| Nenyaviridae        | Entamoeba-associated CRESS DNA virus 4, 84-AMS-03                               | MT293420            | 42.05                      | Entamoeba histolytica          | AAFB00000000.2        | 25.20                     |
| Nenyaviridae        | Unidentified circular ssDNA virus clone V16C Rep and hypothetical protein genes | MG571899            | 44.14                      | Entamoeba histolytica          | AAFB00000000.2        | 25.20                     |
| Nenyaviridae        | Circoviridae sp. isolate ctga69, complete genome                                | MH617639            | 40.36                      | Entamoeba histolytica          | AAFB00000000.2        | 25.20                     |
| Nenyaviridae        | Unidentified circular ssDNA virus isolate cg6319, complete genome               | KU043415            | 34.17                      | Entamoeba histolytica          | AAFB00000000.2        | 25.20                     |
| Vilyaviridae        | Giardia-associated CRESS DNA virus 1, 84-AMS-01                                 | MT293421            | 60.54                      | Giardia duodenalis             | NZ_AACB00000000.2     | 48.20                     |
| Vilyaviridae        | Giardia-associated CRESS DNA virus 1, 84-AMS-02                                 | MT293422            | 60.57                      | Giardia duodenalis             | NZ_AACB00000000.2     | 48.20                     |
| Vilyaviridae        | Giardia-associated CRESS DNA virus 1, 84-AMS-03                                 | MT293423            | 61.10                      | Giardia duodenalis             | NZ_AACB00000000.2     | 48.20                     |
| Vilyaviridae        | Giardia-associated CRESS DNA virus 2, 84-AMS-01                                 | MT293425            | 59.89                      | Giardia duodenalis             | NZ_AACB00000000.2     | 48.20                     |
| Vilyaviridae        | Giardia-associated CRESS DNA virus 2, 84-AMS-02                                 | MT293426            | 53.25                      | Giardia duodenalis             | NZ_AACB00000000.2     | 48.20                     |
| Vilyaviridae        | Giardia-associated CRESS DNA virus 3, 84-AMS-02                                 | MT293428            | 55.82                      | Giardia duodenalis             | NZ_AACB00000000.2     | 48.20                     |
| Vilyaviridae        | Giardia-associated CRESS DNA virus 4, 84-AMS-01                                 | MT293429            | 60.47                      | Giardia duodenalis             | NZ_AACB00000000.2     | 48.20                     |
| Vilyaviridae        | Uncultured virus clone CG97, complete genome                                    | KY487991            | 55.33                      | Giardia duodenalis             | NZ_AACB00000000.2     | 48.20                     |
| Vilyaviridae        | Feline stool-associated circular virus KU7 DNA, complete genome                 | LC406405            | 57.67                      | Giardia duodenalis             | NZ_AACB00000000.2     | 48.20                     |
| Alphasatellitidae   | Chilli leaf curl India alphasatellite                                           | NC_027431           | 40.87                      | Capsicum annuum                | GCA_000710875.1       | 35.41                     |
| Alphasatellitidae   | Chilli leaf curl Multan alphasatellite                                          | NC_013103           | 40.69                      | Capsicum annuum                | GCA_000710875.1       | 35.41                     |
| Alphasatellitidae   | Papaya leaf curl alphasatellite clone PaLCuA[PK/Mul/07]                         | NC_023292           | 40.47                      | Carica papaya                  | GCA_000150535.1       | 39.01                     |

|                   |                                                                      |           |       |                         |                 |       |
|-------------------|----------------------------------------------------------------------|-----------|-------|-------------------------|-----------------|-------|
| Alphasatellitidae | Coconut foliar decay alphasatellite 3                                | NC_040624 | 39.62 | Cocos nucifera          | GCA_006176705.1 | 37.60 |
| Alphasatellitidae | Coconut foliar decay alphasatellite 6                                | NC_040697 | 41.61 | Cocos nucifera          | GCA_006176705.1 | 37.60 |
| Alphasatellitidae | Cucurbit yellow mosaic alphasatellite isolate 51SA                   | NC_029907 | 40.15 | Cucurbita pepo          | GCA_002806865.2 | 37.26 |
| Alphasatellitidae | Cotton leaf curl Burewala alphasatellite                             | NC_013803 | 42.31 | Gossypium hirsutum      | GCA_000987745.1 | 34.90 |
| Alphasatellitidae | Cotton leaf curl virus associated alphasatellite                     | KM070823  | 40.70 | Gossypium hirsutum      | GCA_000987745.1 | 34.90 |
| Alphasatellitidae | Cotton leaf curl virus associated DNA 1 isolate Lucknow              | NC_015327 | 43.05 | Gossypium hirsutum      | GCA_000987745.1 | 34.90 |
| Alphasatellitidae | Hibiscus leaf curl alphasatellite                                    | NC_033273 | 40.07 | Hibiscus syriacus       | GCA_006381635.1 | 34.30 |
| Alphasatellitidae | Cassava mosaic Madagascar alphasatellite                             | NC_018628 | 44.93 | Manihot esculenta       | GCA_001659605.1 | 38.01 |
| Alphasatellitidae | Banana bunchy top alphasatellite 1                                   | NC_038892 | 43.34 | Musa acuminata          | GCA_000313855.2 | 40.73 |
| Alphasatellitidae | Banana bunchy top alphasatellite 2                                   | NC_038953 | 43.64 | Musa acuminata          | GCA_000313855.2 | 40.73 |
| Alphasatellitidae | Subterranean clover stunt C2                                         | NC_003814 | 42.07 | Trifolium subterraneum  | GCA_001742945.1 | 35.20 |
| Alphasatellitidae | Subterranean clover stunt C6 alphasatellite                          | NC_003818 | 41.79 | Trifolium subterraneum  | GCA_001742945.1 | 35.20 |
| Alphasatellitidae | Faba bean necrotic yellows C1 alphasatellite                         | NC_024886 | 39.32 | Vicia faba              | GCA_001375635.1 | 38.90 |
| Alphasatellitidae | Faba bean necrotic yellows C11 alphasatellite                        | NC_003558 | 40.14 | Vicia faba              | GCA_001375635.1 | 38.90 |
| Circoviridae      | Anguilla anguilla circovirus                                         | NC_023421 | 48.69 | Anguilla anguilla       | GCA_000695075.1 | 42.90 |
| Circoviridae      | Pigeon circovirus strain SF079/ShangHai/2014                         | KX108827  | 55.36 | Columba livia           | GCA_000337935.1 | 41.60 |
| Circoviridae      | Beak and feather disease virus natural-host Cacatua galerita         | AF311301  | 52.76 | Melopsittacus undulatus | NC_009134.1     | 41.40 |
| Circoviridae      | Beak and feather disease virus natural-host Cacatua leabeateri       | AF311300  | 53.68 | Melopsittacus undulatus | NC_009134.1     | 41.40 |
| Circoviridae      | Beak and feather disease virus natural-host Trichoglossus haematodus | AF311299  | 53.71 | Melopsittacus undulatus | NC_009134.1     | 41.40 |
| Circoviridae      | Canary circovirus                                                    | NC_003410 | 51.28 | Serinus canaria         | GCA_000534875.1 | 42.60 |
| Circoviridae      | Porcine circovirus 2 isolate AUT1                                    | AY424401  | 48.53 | Sus scrofa              | GCA_000003025.6 | 41.97 |
| Geminiviridae     | Beet curly top Iran virus-[Siv]                                      | JX082259  | 40.60 | Beta vulgaris           | GCA_000511025.2 | 37.30 |
| Geminiviridae     | Chilli leaf curl virus-Noida                                         | HM140371  | 44.03 | Capsicum annuum         | GCA_000710875.1 | 35.41 |
| Geminiviridae     | Pepper leaf curl Yunnan virus-[YN323]                                | NC_010618 | 41.72 | Capsicum annuum         | GCA_000710875.1 | 35.41 |
| Geminiviridae     | Papaya leaf crumple virus complete genome                            | HE580236  | 44.36 | Carica papaya           | GCA_000150535.1 | 39.01 |
| Geminiviridae     | Papaya leaf curl China virus GX4 complete genome                     | FN297834  | 41.97 | Carica papaya           | GCA_000150535.1 | 39.01 |
| Geminiviridae     | Chickpea chlorosis Australia virus isolate CpCV-D_AU_3494I_2002      | NC_022131 | 39.89 | Cicer arietinum         | GCA_000331145.1 | 32.67 |
| Geminiviridae     | Chickpea chlorosis virus isolate F 3487J                             | KC172700  | 43.05 | Cicer arietinum         | GCA_000331145.1 | 32.67 |
| Geminiviridae     | Chickpea yellow dwarf virus isolate CpYDV-                           | NC_025475 | 41.03 | Cicer arietinum         | GCA_000331145.1 | 32.67 |

|               |                                                               |                                             |       |                                                     |                 |       |
|---------------|---------------------------------------------------------------|---------------------------------------------|-------|-----------------------------------------------------|-----------------|-------|
|               | PK_PK103_2012                                                 |                                             |       |                                                     |                 |       |
| Geminiviridae | Squash leaf curl virus                                        | NC_001936-37                                | 44.06 | Cucurbita pepo                                      | GCA_002806865.2 | 37.26 |
| Geminiviridae | Squash yellow mild mottle virus                               | NC_003860,<br>NC_003865                     | 43.02 | Cucurbita pepo                                      | GCA_002806865.2 | 37.26 |
| Geminiviridae | Cotton leaf curl Alabad virus                                 | NC_004582                                   | 42.75 | Gossypium hirsutum                                  | GCA_000987745.1 | 34.90 |
| Geminiviridae | Cotton leaf curl Multan virus-[Faisalabad2]                   | AJ496287                                    | 43.71 | Gossypium hirsutum                                  | GCA_000987745.1 | 34.90 |
| Geminiviridae | Abutilon mosaic virus                                         | NC_001928-29                                | 46.71 | Hibiscus syriacus                                   | GCA_006381635.1 | 34.30 |
| Geminiviridae | Barley dwarf virus complete genome, isolate DE45BDV           | HF968650                                    | 49.23 | Hordeum vulgare                                     | GCA_000326125.1 | 44.90 |
| Geminiviridae | Apple geminivirus PL-2015                                     | NC_026760                                   | 45.57 | Malus domestica                                     | GCA_002114115.1 | 39.36 |
| Geminiviridae | African cassava mosaic virus                                  | GCA_000857205                               | 42.13 | Manihot esculenta                                   | GCA_001659605.1 | 38.01 |
| Geminiviridae | Tomato pseudo-curly top virus                                 | NC_003825                                   | 41.60 | Solanum lycopersicum                                | GCA_000188115.3 | 35.70 |
| Geminiviridae | Tomato yellow vein streak virus                               | NC_010949-50                                | 39.47 | Solanum lycopersicum                                | GCA_000188115.3 | 35.70 |
| Geminiviridae | Potato yellow mosaic virus                                    | NC_001934-35                                | 43.31 | Solanum tuberosum                                   | GCA_000226075.1 | 35.60 |
| Geminiviridae | Wheat dwarf virus - [Sweden]                                  | X02869                                      | 47.72 | Triticum aestivum                                   | GCA_900067645.1 | 43.50 |
| Geminiviridae | Cowpea golden mosaic virus-[Nigeria] DNA-A                    | NC_038445                                   | 45.57 | Vigna unguiculata                                   | GCA_004118075.1 | 33.06 |
| Geminiviridae | Wild vitis virus 1 isolate WVV1-NY1468                        | NC_035480                                   | 42.25 | Vitis vinifera                                      | GCA_000003745.2 | 35.03 |
| Geminiviridae | Maize streak virus - E[Pat] isolate MSV-Pat                   | AF329888                                    | 49.61 | Zea mays                                            | GCA_000005005.6 | 46.91 |
| Genomoviridae | Sclerotinia sclerotiorum hypovirulence associated DNA virus 1 | GQ365709                                    | 47.22 | Sclerotinia sclerotiorum                            | AAGT00000000.1  | 41.70 |
| Genomoviridae | Sclerotinia sclerotiorum hypovirulence associated DNA virus 1 | KM598384                                    | 46.81 | Sclerotinia sclerotiorum                            | AAGT00000000.1  | 41.70 |
| Nanoviridae   | Abaca bunchy top virus                                        | NC_010314-19                                | 41.05 | Musa acuminata                                      | GCA_000313855.2 | 40.73 |
| Nanoviridae   | Banana bunchy top virus                                       | NC_003473-77,<br>NC_003479                  | 40.38 | Musa acuminata                                      | GCA_000313855.2 | 40.73 |
| Nanoviridae   | Pea necrotic yellow dwarf virus                               | GCA_000914235                               | 40.10 | Pisum sativum                                       | PUCA000000000.1 | 37.70 |
| Nanoviridae   | Pea yellow stunt virus                                        | GCA_000915955                               | 41.25 | Pisum sativum                                       | PUCA000000000.1 | 37.70 |
| Nanoviridae   | Subterranean clover stunt virus                               | NC_003812-13,<br>NC_003815-17,<br>NC_003819 | 38.81 | Trifolium subterraneum                              | GCA_001742945.1 | 35.20 |
| Nanoviridae   | Faba bean yellow leaf virus                                   | NC_038908                                   | 37.32 | Vicia faba                                          | GCA_001375635.1 | 38.90 |
| Smacoviridae  | Human smacovirus 1 isolate France/12/2008/3454                | NC_026252                                   | 43.94 | Candidatus<br>Methanomassiliicoccus<br>intestinalis | NC_021353.1     | 41.30 |

Supplementary Table 10. Primer and probe sequences used in this study.

| Name                | Sequence                          | Description                             |
|---------------------|-----------------------------------|-----------------------------------------|
| F11_A1_F1           | GCAAGACGCTTCCAACCTACGC            | MT293412 inverse PCR amplicon 1         |
| F11_A1_R1           | GCAGGATTCAAAGCAAATGCAGC           | MT293412 inverse PCR amplicon 1         |
| F11_A2_F1           | CGAGAATTTGGCTTCAGAGTGG            | MT293412 inverse PCR amplicon 2         |
| F11_A2_R1           | CGTCTTCTCCTTATGCAATC              | MT293412 inverse PCR amplicon 2         |
| F11_A3_F1           | GCTTCAGACAGGGGATTCTG              | MT293412 inverse PCR amplicon 3         |
| F11_A3_R1           | GGAAGGCTTCATGTCAGAG               | MT293412 inverse PCR amplicon 3         |
| F95_A1_F1           | CGTTACAATACTTGACTCGATC            | MT293415 inverse PCR amplicon 1 round 1 |
| F95_A1_R1           | GACTGGAGTTTCTAGGGATG              | MT293415 inverse PCR amplicon 1 round 1 |
| F95_A1_F2           | GCTCAAGTTCACGTAATTTATC            | MT293415 inverse PCR amplicon 1 round 2 |
| F95_A1_R2           | GACTCAGTAAGGCTGCTTGG              | MT293415 inverse PCR amplicon 1 round 2 |
| F95_A2_F1           | GCTGGTCTGCATTATGTTTG              | MT293415 inverse PCR amplicon 2 round 1 |
| F95_A2_R1           | CATAATATCTGTTCTGATAACG            | MT293415 inverse PCR amplicon 2 round 1 |
| F95_A2_F2           | CTTCACAAAGTGTCTACTG               | MT293415 inverse PCR amplicon 2 round 2 |
| F95_A2_R2           | CTTCTGTAATAACCTCTAGCC             | MT293415 inverse PCR amplicon 2 round 2 |
| F11_A1_F2           | CTTAACCAACCAGACGAATATG            | Filtrate screening PCR                  |
| F11_A3_R1           | GGAAGGCTTCATGTCAGAG               | Filtrate screening PCR                  |
| S7072_A1_F1         | CCAGTTGACTCTTAACCAGC              | MT293413 amplification PCR amplicon 1   |
| S7072_A1_R1         | CATCCTCTTAGCCTAGCTTTC             | MT293413 amplification PCR amplicon 1   |
| S7072_A2_F1         | GAAAATCGAAGAAAGTCTTTG             | MT293413 amplification PCR amplicon 2   |
| S7072_A2_R1         | GTAATTATTTGAGGGAGACTATC           | MT293413 amplification PCR amplicon 2   |
| S7072_A3_F1         | TTCATCTTAGAAGTTTGAAG              | MT293413 amplification PCR amplicon 3   |
| S7072_A3_R1         | GTTTTAACAGAAGGTATCCATTT           | MT293413 amplification PCR amplicon 3   |
| S7072_A4_F1         | GGCTGGCTATACTACTCTCA              | MT293413 amplification PCR amplicon 4   |
| S7072_A4_R1         | CATATAAGGCTTAACATAGAAC            | MT293413 amplification PCR amplicon 4   |
| S7072_A5_F1         | ATCCTGAAGATGATTCTAAAC             | MT293413 amplification PCR amplicon 5   |
| S7072_A5_R1         | CCATGTAGCAGTTTGAGAAG              | MT293413 amplification PCR amplicon 5   |
| S7072_A6_F1         | GAAGAGGATGAGATATGTTAAG            | MT293413 amplification PCR amplicon 6   |
| S7072_A6_R1         | TGTTCAGGCTGGTTAAGAGTC             | MT293413 amplification PCR amplicon 6   |
| Ent_18S_F1          | GTTGATCCTGCCAGTATT                | Entamoeba generic 18S PCR               |
| Ent_18S_R1          | GAGCTGGAATTACCGC                  | Entamoeba generic 18S PCR               |
| Ent_18S_F2          | CCTGCCAGTATTATATGC                | Entamoeba generic 18S PCR               |
| Ent_18S_R2          | GCACCAGACTGCCCTCC                 | Entamoeba generic 18S PCR               |
| E_histolytica_F1    | ATTgTcTgTggCATCCTAACTCA           | Entamoeba histolytica diagnostic qPCR   |
| E_histolytica_R1    | gCggACggCTCATTATAACA              | Entamoeba histolytica diagnostic qPCR   |
| E_histolytica_probe | UCAUUGAAUGAAUUGCCAUUU             | Entamoeba histolytica diagnostic qPCR   |
| G_duodenalis_F1     | GACGGCTCAGGACAACGGTT              | Giardia duodenalis diagnostic qPCR      |
| G_duodenalis_R1     | TTGCCAGCGGTGTCCG                  | Giardia duodenalis diagnostic qPCR      |
| G_duodenalis_probe  | CCCGCGGCGGTCCCTGCTAG              | Giardia duodenalis diagnostic qPCR      |
| D_fragilis_F1       | CAACGGATGTCTTGGCTCTTTA            | Dientamoeba fragilis diagnostic qPCR    |
| D_fragilis_R1       | TGCATTCAAAGATCGAACTTATCAC         | Dientamoeba fragilis diagnostic qPCR    |
| D_fragilis_probe    | CAATTCTAGCCGCTTAT                 | Dientamoeba fragilis diagnostic qPCR    |
| Cry_spp_F1          | CGCTTCTTAGCCTTTCATGA              | Cryptosporidium diagnostic qPCR         |
| Cry_spp_R1          | CTTCACGTGTGTTTGCCAAT              | Cryptosporidium diagnostic qPCR         |
| Cry_spp_probe       | CCAATCACAGAATCATCAGAATCGACTGGTATC | Cryptosporidium diagnostic qPCR         |
| Blast_spp_F1        | CGTTGTTGCAGTAAAAAGCTCGT           | Blastocystis diagnostic qPCR            |
| Blast_spp_R1        | GATTAATGAAAACATCCTTGTTAAATGC      | Blastocystis diagnostic qPCR            |
| Blast_spp_probe     | CAGTTGGGGGTATTCATATTC             | Blastocystis diagnostic qPCR            |



## Supplementary References

1. Pollo, S. M. J. *et al.* Benchmarking hybrid assemblies of *Giardia* and prediction of widespread intra-isolate structural variation. *Parasites and Vectors* **13**, 108 (2020).
2. Krzywinski, M. *et al.* Circos: an information aesthetic for comparative genomics. *Genome Res.* **19**, 1639–45 (2009).
3. Krupovic, M. & Forterre, P. Single-stranded DNA viruses employ a variety of mechanisms for integration into host genomes. *Ann. N. Y. Acad. Sci.* **1341**, 41–53 (2015).
4. Zhang, H., Ehrenkaufner, G. M., Hall, N. & Singh, U. Small RNA pyrosequencing in the protozoan parasite *Entamoeba histolytica* reveals strain-specific small RNAs that target virulence genes. *BMC Genomics* **14** (2013).
5. Heyraud, F., Matzeit, V., Schaefer, S., Schell, J. & Gronenborn, B. The conserved nonanucleotide motif of the geminivirus stem-loop sequence promotes replicational release of virus molecules from redundant copies. *Biochimie* **75**, 605–615 (1993).
6. Zuker, M. Mfold web server for nucleic acid folding and hybridization prediction. *Nucleic Acids Res.* **31**, 3406–3415 (2003).
7. Potter, S. C. *et al.* HMMER web server: 2018 update. *Nucleic Acids Res.* **46**, W200–W204 (2018).
8. Abbas, A. A. *et al.* *Redondoviridae*, a family of small, circular DNA viruses of the human oro-respiratory tract that are associated with periodontitis and critical illness. *Cell Host Microbe* **25**, 719–729 (2019).
